# Supplementary material for: Computational reverse chemical ecology: Virtual screening and predicting behaviorally active semiochemicals for Bactrocera dorsalis
Source: PubMed Central journal article supplement (PMC4003815; doi:10.1186/1471-2164-15-209), 2014-03-19

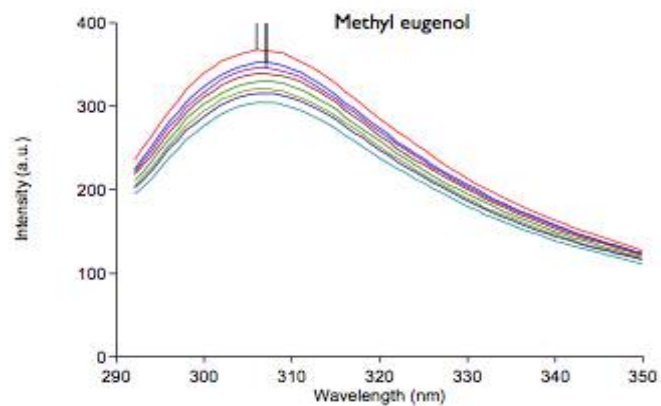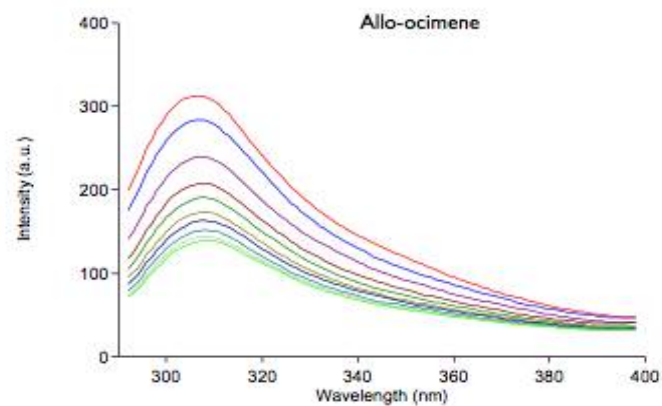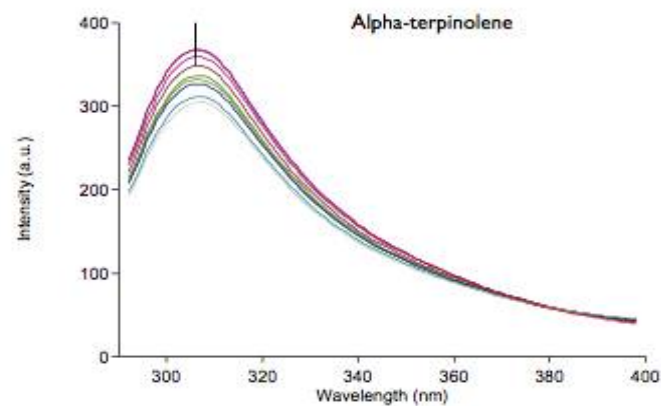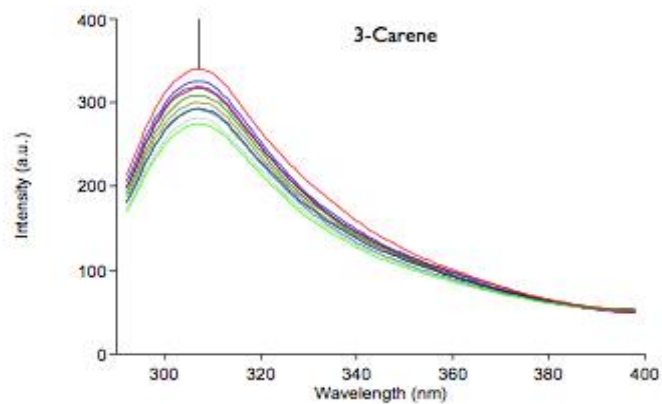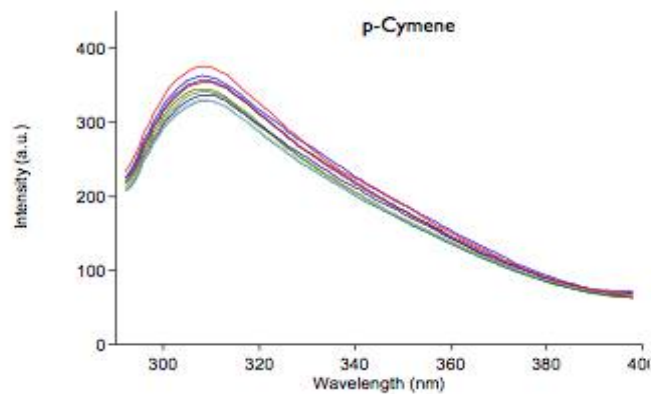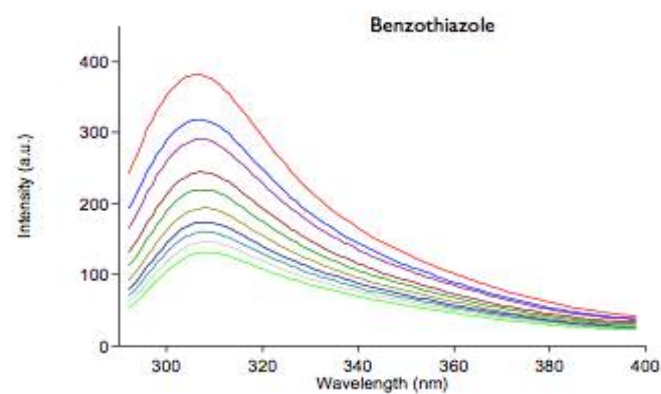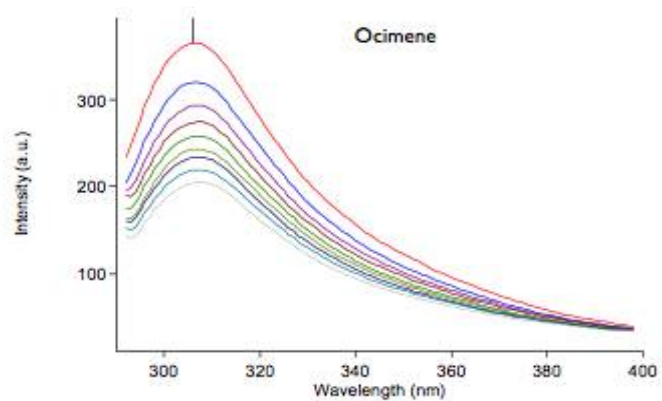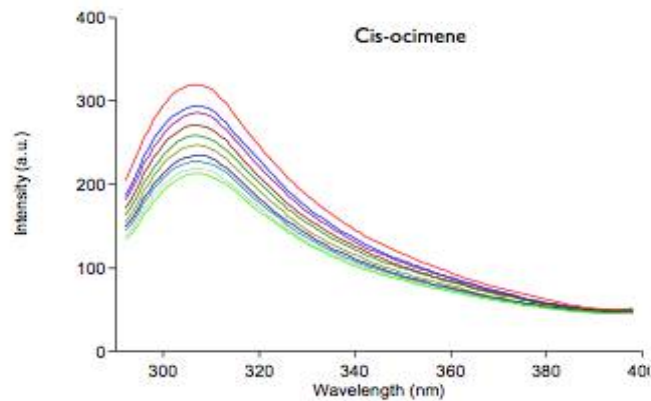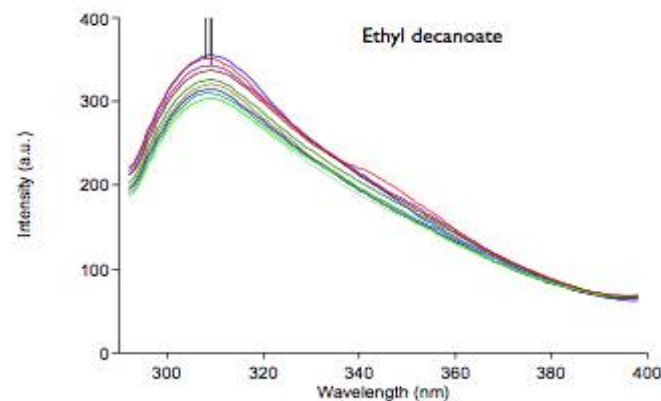

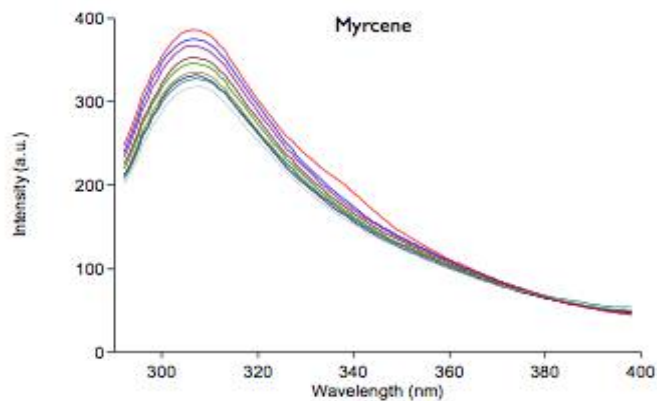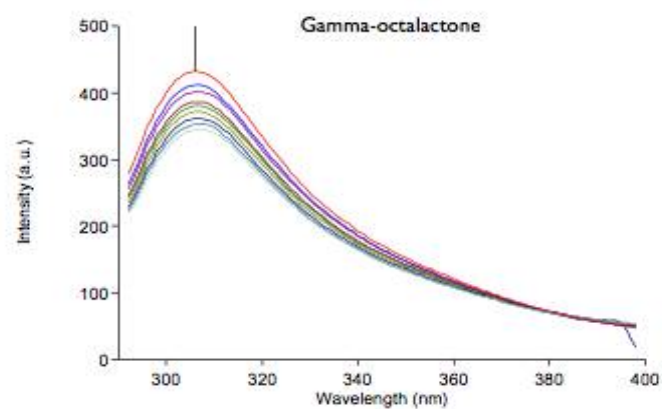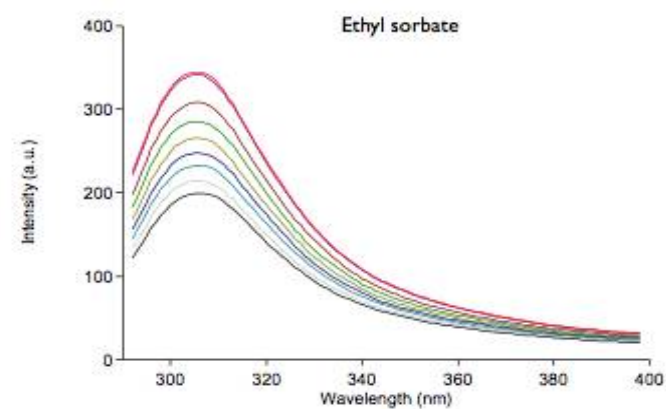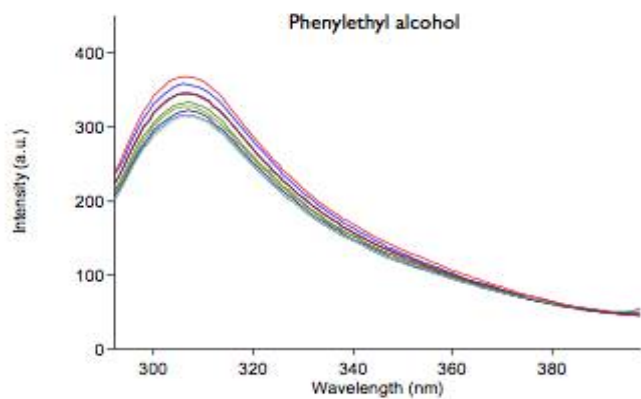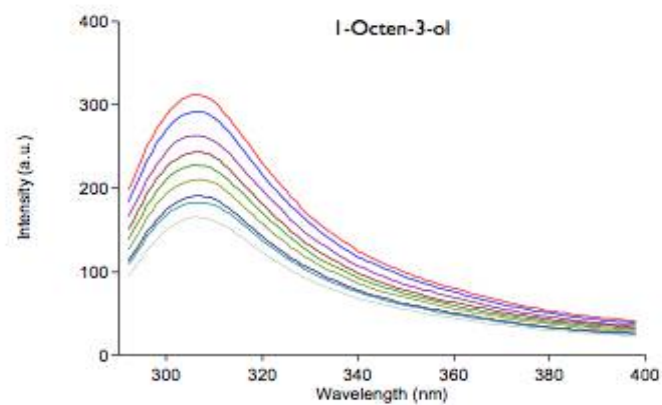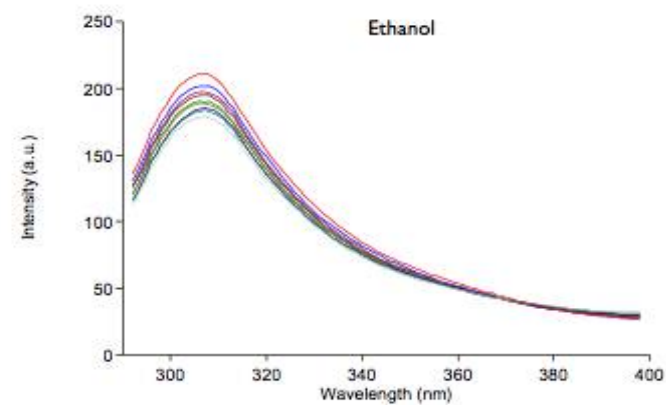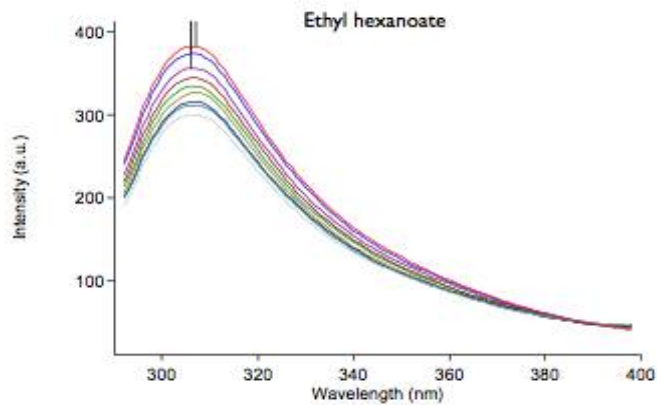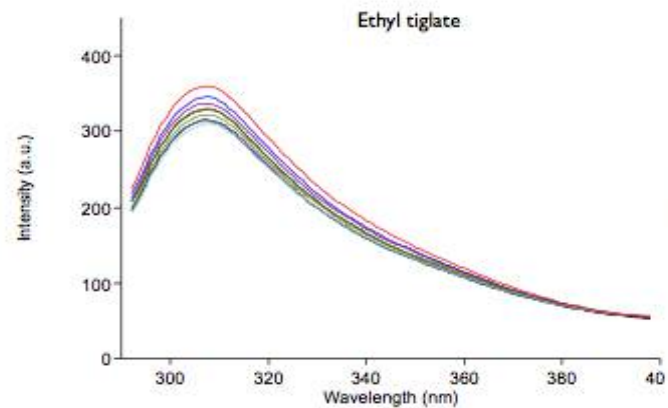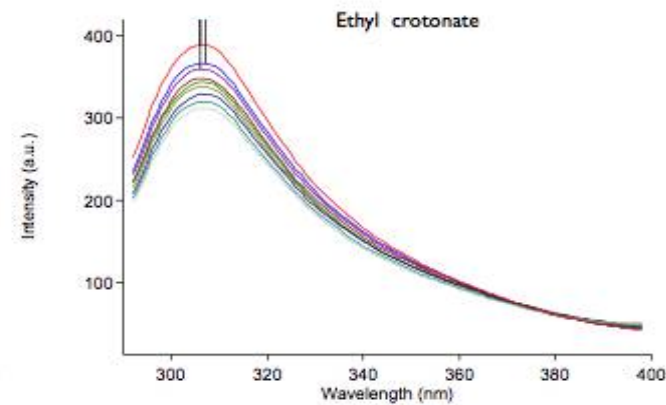

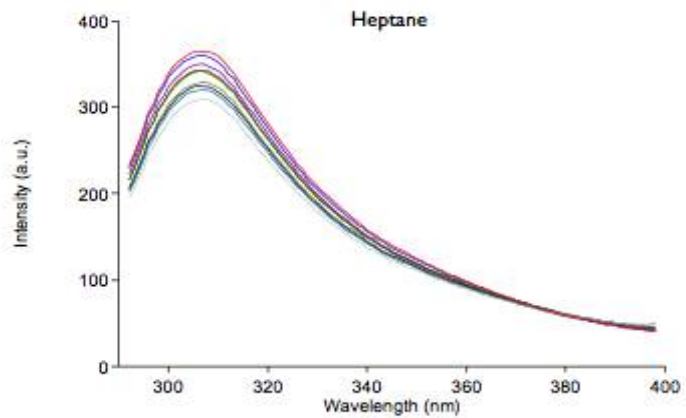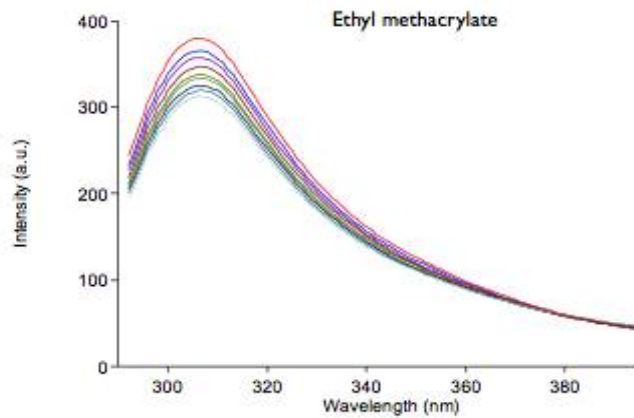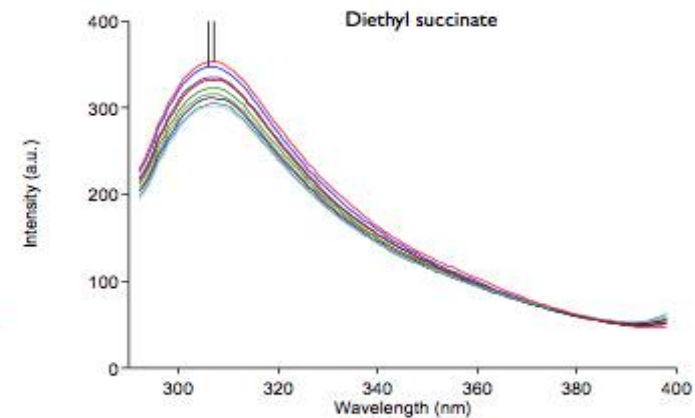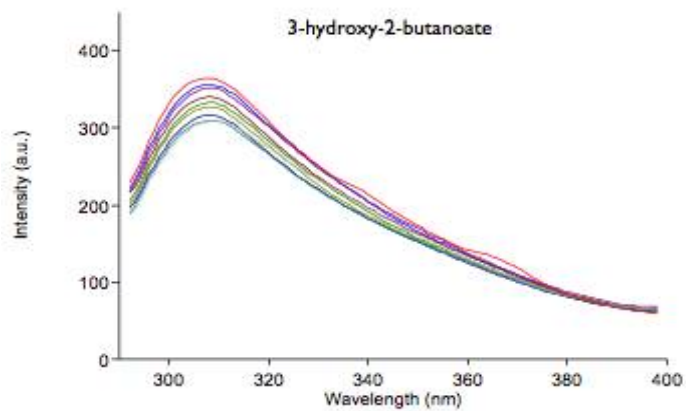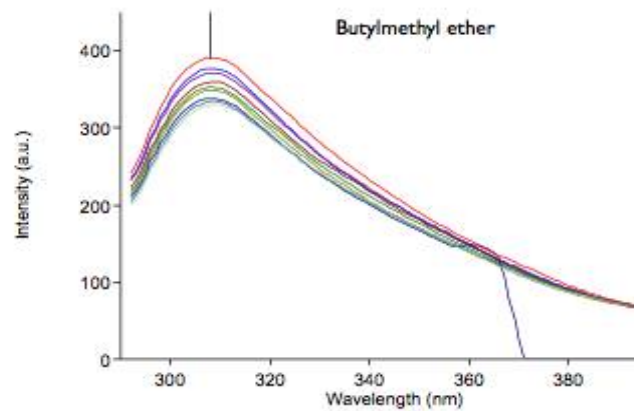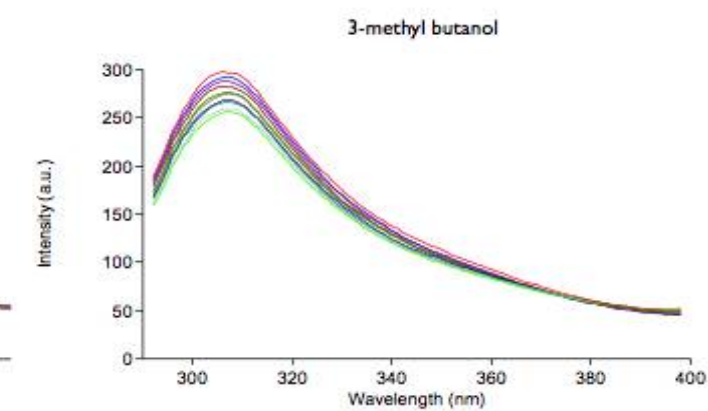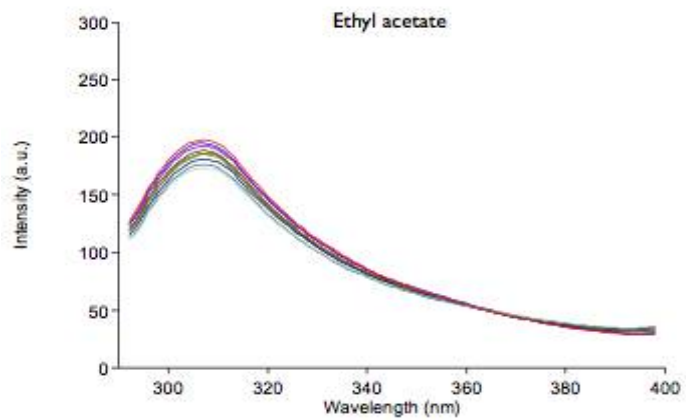

Supplement: 1471-2164-15-209-S2.pdf [file 1471-2164-15-209-S2.pdf]
